# Supplementary material
Source: publisher figshare collection journal article supplement (https://gsajournals.figshare.com/ndownloader/files/28547724)
Supplement: Supplementary file 1 [file 28547724]

Supplemental Table 1. Strains used in this study.

| Figure 2A |  | |
| --- | --- | --- |
| DY150 | *MAT***a** *ade2 can1 his3 leu2 trp1 ura3* | |
| DY18964 | *MAT***a** *tup1(L565P)* | |
| DY17847 | *MAT***a** *tup1(H575Y)* | |
| DY18972 | *MAT***a** *tup1(D597N)* | |
| DY19304 | *MAT***a** *tup1(S649F)* | |
| DY19087 | *MAT***a** *tup1(N673D)* | |
| DY18978 | *MAT***a** *tup1(C700R)* | |
| DY3420 | *MAT* | |
| DY18965 | *MAT* *tup1(L565P)* | |
| DY17848 | *MAT* *tup1(H575Y)* | |
| DY18974 | *MAT* *tup1(D597N)* | |
| DY19306 | *MAT* *tup1(S649F)* | |
| DY19089 | *MAT* *tup1(N673D)* | |
| DY18980 | *MAT* *tup1(C700R)* | |
| Figure 2B |  | |
| DY150 | *MAT***a** *ade2 can1 his3 leu2 trp1 ura3* | |
| DY18164 | *tup1(∆+1 to +2142):URA3(Kluyveromyces lactis):KanMX* | |
| DY19304 | *MAT***a** *tup1(S649F)* | |
| Figure 3A |  | |
| DY150 | *MAT***a** *ade2 can1 his3 leu2 trp1 ura3* | |
| DY408 | *MAT***a** *swi5::URA3popout* | |
| DY4846 | *MAT***a** *swi5::URA3popout ash1::LEU2* | |
| DY18983 | *MAT***a** *tup1(L565P)* *swi5::URA3popout* *ash1::LEU2* | |
| DY18564 | *MAT***a** *tup1(H575Y)* *swi5::URA3popout* *ash1::LEU2* | |
| DY18994 | *MAT***a** *tup1(D597N)* *swi5::URA3popout* *ash1::LEU2* | |
| DY19297 | *MAT***a** *tup1(S649F)* *swi5::URA3popout ash1::LEU2* | |
| DY19077 | *MAT***a** *tup1(N673D)* *swi5::URA3popout* *ash1::LEU2* | |
| DY19001 | *MAT***a** *tup1(C700R)* *swi5::URA3popout* *ash1::LEU2* | |
| Figure 3B | |
| DY150 | *MAT***a** *ade2 can1 his3 leu2 trp1 ura3* |
| DY5116 | *MAT***a** *gcn5::TRP1* |
| DY18960 | *MAT***a** *tup1(L565P)* *gcn5::TRP1* |
| DY18286 | *MAT***a** *tup1(H575Y)* *gcn5::TRP1* |
| DY18970 | *MAT* *tup1(D597N)* *gcn5::TRP1* |
| DY19308 | *MAT***a** *tup1(S649F)* *gcn5::TRP1* |
| DY19091 | *MAT***a** *tup1(N673D)* *gcn5::TRP1* |
| DY18975 | *MAT***a** *tup1(C700R)* *gcn5::TRP1* |
| Figure 3C |  |
| DY150 | *MAT***a** *ade2 can1 his3 leu2 trp1 ura3* |
| DY18964 | *MAT***a** *tup1(L565P)* |
| DY17847 | *MAT***a** *tup1(H575Y)* |
| DY18972 | *MAT***a** *tup1(D597N)* |
| DY19304 | *MAT***a** *tup1(S649F)* |
| DY19087 | *MAT***a** *tup1(N673D)* |
| DY18978 | *MAT***a** *tup1(C700R)* |
| Figure 4A |  |
| DY150 | *MAT***a** *ade2 can1 his3 leu2 trp1 ura3* |
| DY408 | *MAT***a** *swi5::URA3popout* |
| DY4846 | *MAT***a** *swi5::URA3popout* *ash1::LEU2* |
| DY19094 | *MAT***a** *tup1(K650Q)* *swi5::URA3popout* *ash1::LEU2* |
| DY19189 | *MAT***a** *tup1(K650R)* *swi5::URA3popout* *ash1::LEU2* |
| DY19297 | *MAT***a** *tup1(S649F)* *swi5::URA3popout* *ash1::LEU2* |
| DY19443 | *MAT***a** *tup1(S649A)* *swi5::URA3popout* *ash1::LEU2* |
| Figure 4B |  |
| DY150 | *MAT***a** *ade2 can1 his3 leu2 trp1 ura3* |
| DY5116 | *MAT***a** *gcn5::TRP1* |
| DY19106 | *MAT***a** *tup1(K650Q)* *gcn5::TRP1* |
| DY19199 | *MAT***a** *tup1(K650R)* *gcn5::TRP1* |
| DY19308 | *MAT***a** *tup1(S649F)* *gcn5::TRP1* |
| DY19454 | *MAT***a** *tup1(S649A)* *gcn5::TRP1* |
| Figure 4C |  |
| DY150 | *MAT***a** *ade2 can1 his3 leu2 trp1 ura3* |
| DY5116 | *MAT***a** *gcn5::TRP1* |
| DY19199 | *MAT***a** *tup1(K650R)* *gcn5::TRP1* |
| DY19308 | *MAT***a**  *tup1(S649F)* *gcn5::TRP1* |
| DY19660 | *MAT***a** *tup1(S649F K650R)* *gcn5::TRP1* |
| Figure 5 and all RNA-Seq | |
| DY150 | *MAT***a** *ade2 can1 his3 leu2 trp1 ura3* |
| DY3420 | *MAT* |
| DY19304 | *MAT***a** *tup1(S649F)* |
| DY19306 | *MAT* *tup1(S649F)* |
| Figure 6A | |
| DY17937 | *MAT***a** *TUP1-V5::HIS3MX ade2 can1 his3 leu2 trp1 ura3* |
| DY17935 | *MAT***a** *TUP1-V5::HIS3MX ash1::LEU2 ade2 can1 his3 leu2 trp1 ura3* |
| DY19743 | *MAT***a** *tup1(S649F)-V5::HIS3MX* |
| Figure 6B and all ChIP-Seq | |
| DY17937 | *MAT***a** *TUP1-V5::HIS3MX ade2 can1 his3 leu2 trp1 ura3* |
| DY17938 | *MAT* *TUP1-V5::HIS3MX ade2 can1 his3 leu2 trp1 ura3* |
| DY19743 | *MAT***a** *tup1(S649F)-V5::HIS3MX* |
| DY19746 | *MAT* *tup1(S649F)-V5::HIS3MX* |
|  |  |
|  |  |
|  |  |
|  |  |
|  |  |
|  |  |
|  |  |
|  |  |
|  |  |
|  |  |
|  |  | |
|  |  | |
|  |  | |
|  |  | |
|  |  | |
|  |  | |
|  |  | |
|  |  | |
|  |  | |
|  |  | |
|  |  | |
|  |  | |
|  |  | |
|  |  | |
|  |  | |
|  |  | |
|  |  | |
|  |  | |
|  |  | |
|  |  | |
|  |  | |
|  |  | |
|  |  | |
|  |  | |
|  |  | |
|  |  | |
|  |  | |
|  |  | |
|  |  | |
|  |  | |
|  |  | |
|  |  | |
|  |  | |
|  |  | |
|  |  | |
|  |  | |
|  |  | |
|  |  | |
|  |  | |
|  |  | |
|  |  | |
|  |  | |
|  |  | |
|  |  | |
|  |  | |
|  |  | |
|  |  | |
|  |  | |
|  |  | |
|  |  | |
|  |  | |
|  |  | |
|  |  | |
|  |  | |
|  |  | |
|  |  | |
|  |  | |
|  |  | |
|  |  | |
|  |  | |
|  |  | |
|  |  | |
|  |  | |
